# Supplementary material for: It Takes Two to Tango: A Bacterial Biofilm Provides Protection against a Fungus-Feeding Bacterial Predator
Source: MDPI journal article supplement (doi:10.3390/microorganisms9081566), 2021-07-23
Supplement: s1 [file s1]

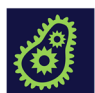

Article

# It takes two to tango: a bacterial biofilm provides protection against a fungus feeding bacterial predator

Shubhangi Sharma<sup>1</sup>, Stéphane Compant<sup>2</sup>, Philipp Franken<sup>1,4</sup>, Silke Ruppel<sup>1</sup> and Max-Bernhard Ballhausen<sup>1,3\*</sup>

<sup>1</sup>Leibniz Institute of Vegetable and Ornamental Crops, Theodor-Echtermeyer-Weg 1, 14979 Großbeeren, Germany.

<sup>2</sup>AIT Austrian Institute of Technology, Center for Health and Bioresources, Konrad Lorenz Strasse 24, 3430 Tulln, Austria.

<sup>3</sup>Present address: Freie Universität Berlin, Altensteinstraße 6, 14195 Berlin.

<sup>4</sup>Present address: Erfurt Research Centre for Horticultural Crops, University of Applied Sciences Erfurt, Kühnhäuser Straße 101, 99090 Erfurt, Germany and Friedrich Schiller University Jena, Institute of Microbiology, Neugasse 24, 07743 Jena, Germany

\*Corresponding author: Max-Bernhard Ballhausen, Freie Universität Berlin, Altensteinstraße 6, 14195 Berlin

Email: m.ballhausen@fu-berlin.de

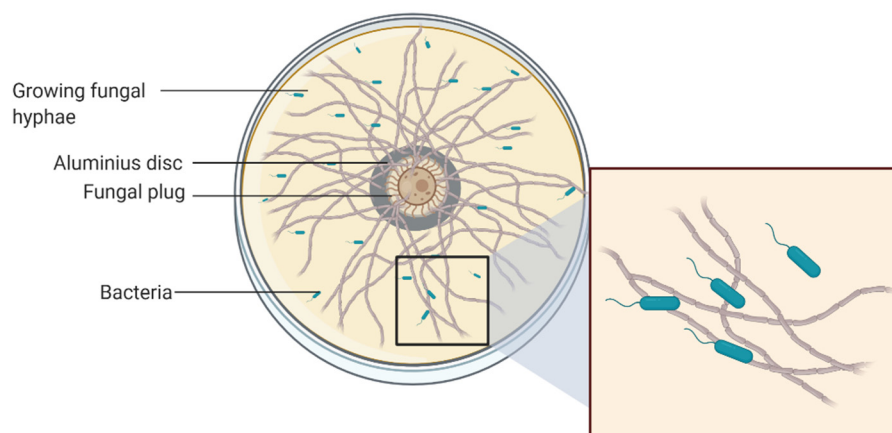

**Figure S1:** *In vitro* mycophagy assay set up. *Collimonas fungivorans* or *Kosakonia radicincitans* were grown on a Petri dish containing phytigel medium. A fungal plug from an actively growing *Serendipita indica* culture was placed in the center of the Petri dish on an aluminum disc. While expanding radially, growing fungal hyphae were confronted with bacteria.

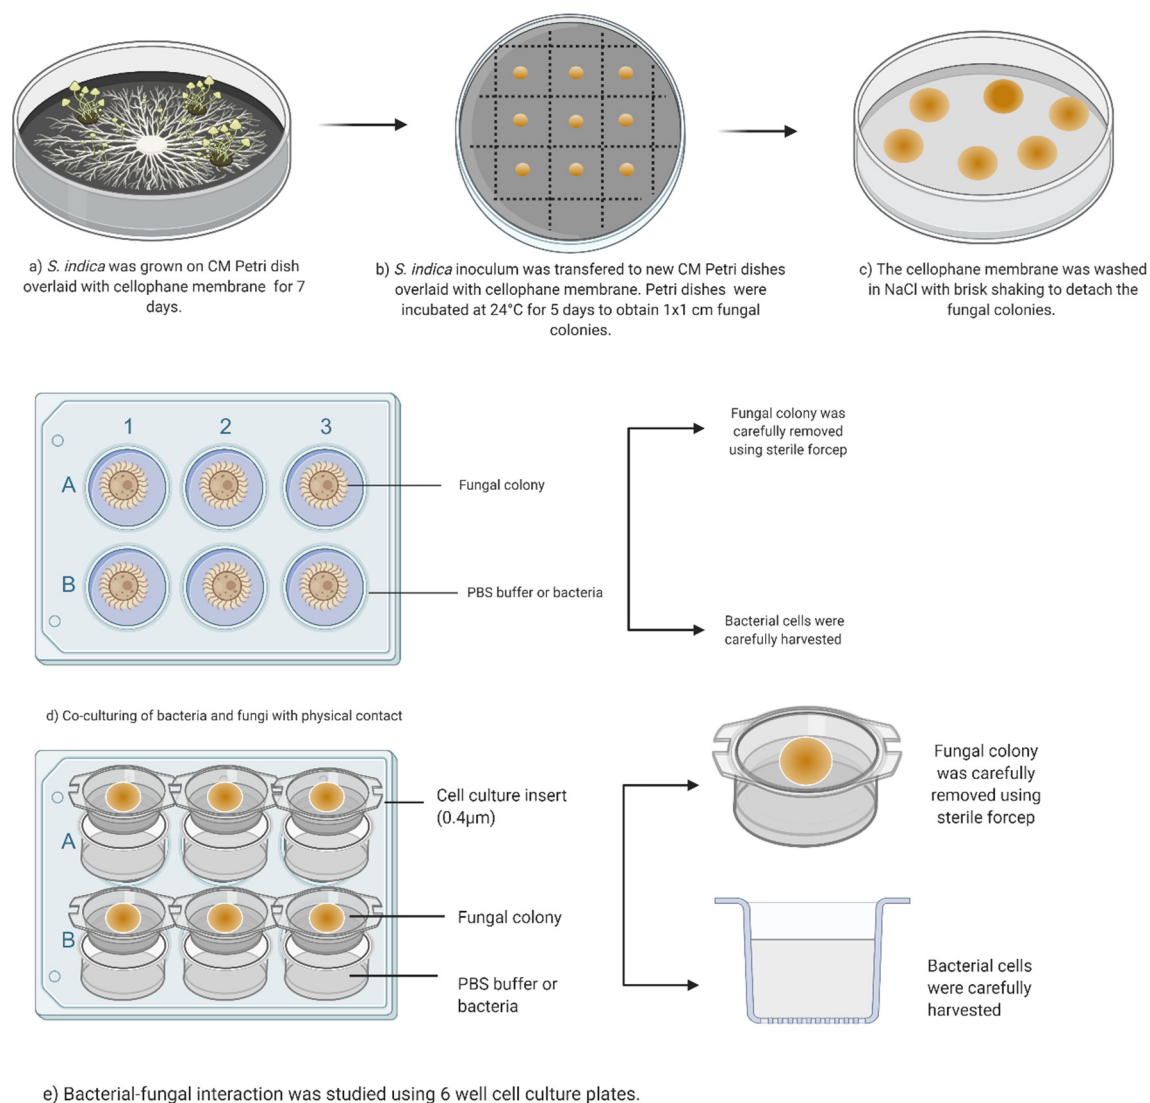

**Figure S2:** Schematic diagram showing (a-c) culturing of *Serendipita indica* fungal colonies on Petri dishes containing solidified CM overlaid with cellophane membrane and detachment of fungal colonies from the cellophane membrane or (d-e) co-culturing of fungus with *Collimonas fungivorans* or *Kosakonia radicincitans* using 6-well plates with or without cell culture inserts.

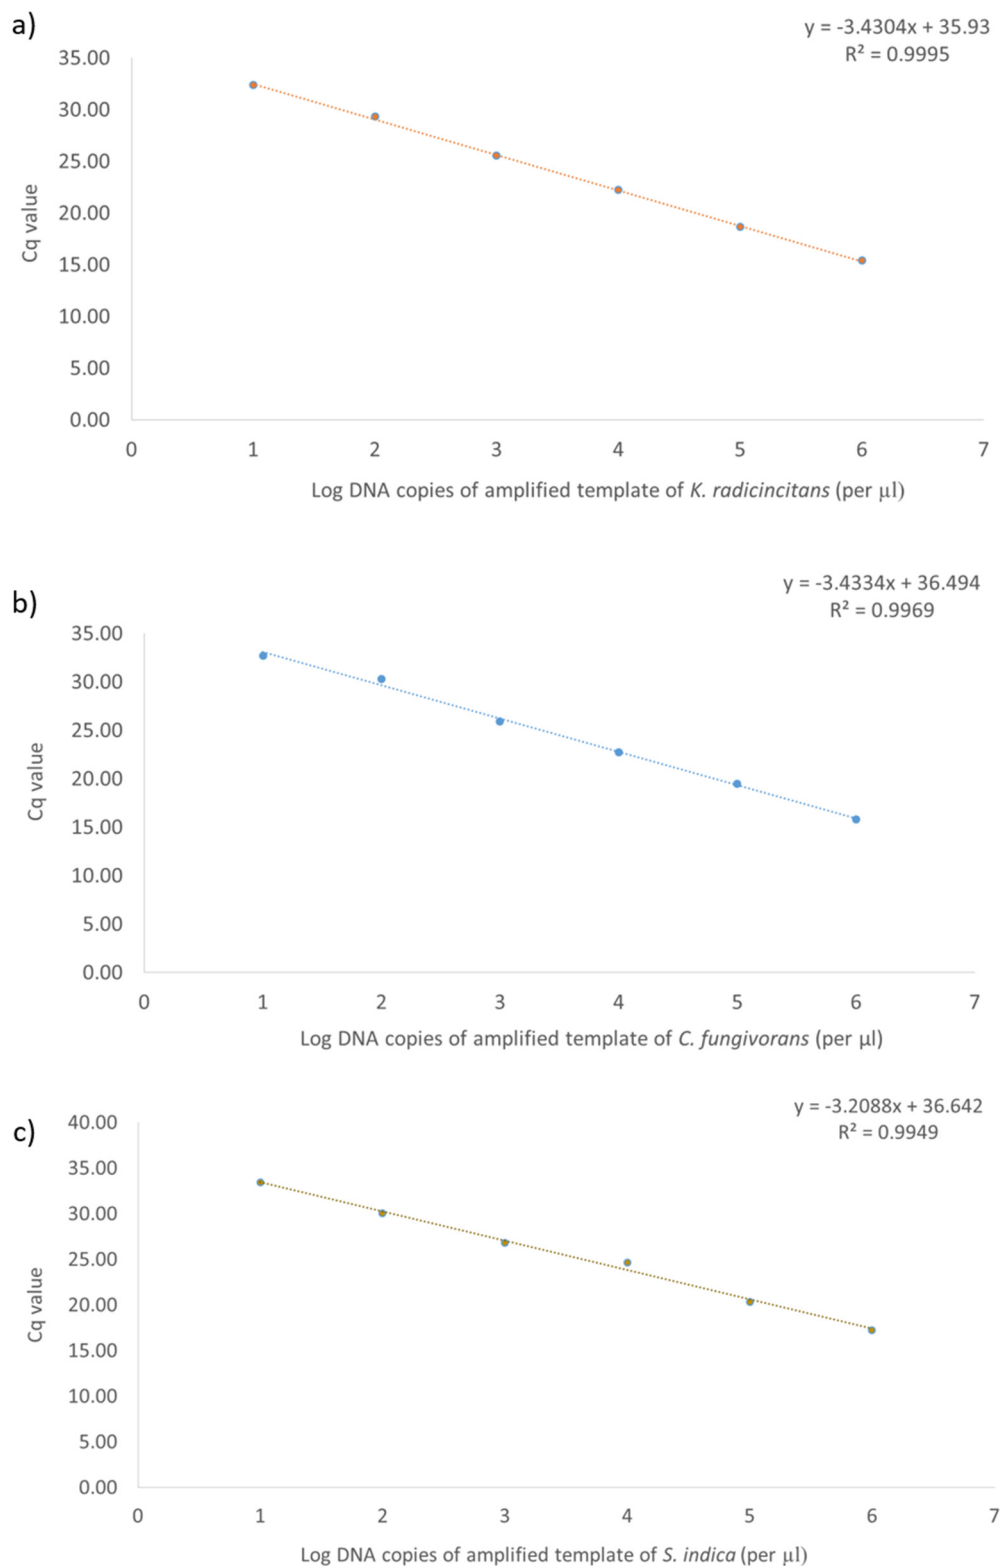

**Figure S3:** qPCR-generated standard curves of a) *Kosakonia radicincitans* and b) *Collimonas fungivorans* for absolute quantification by TaqMan assay using *Kosakonia* and *Collimonas* specific dual-labelled probes. c) Standard curve of *Serendipita indica*, which was quantified by SYBR green I assay.

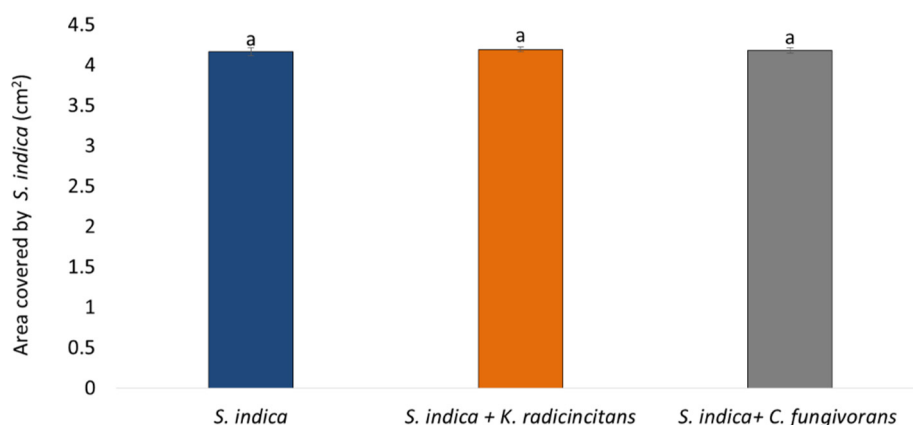

**Figure S4:** Area of *Serendipita indica* colonies (cm<sup>2</sup>) after three weeks of growth. *S. indica* was confronted with either *Kosakonia radicincitans* or *Collimonas fungivorans* on water yeast agar plates. Same letters above bars represent no significant differences ( $P \leq 0.05$ ) according to one way ANOVA followed by a Tukey's range test. Error bars indicate standard deviation of means of three different replicates.

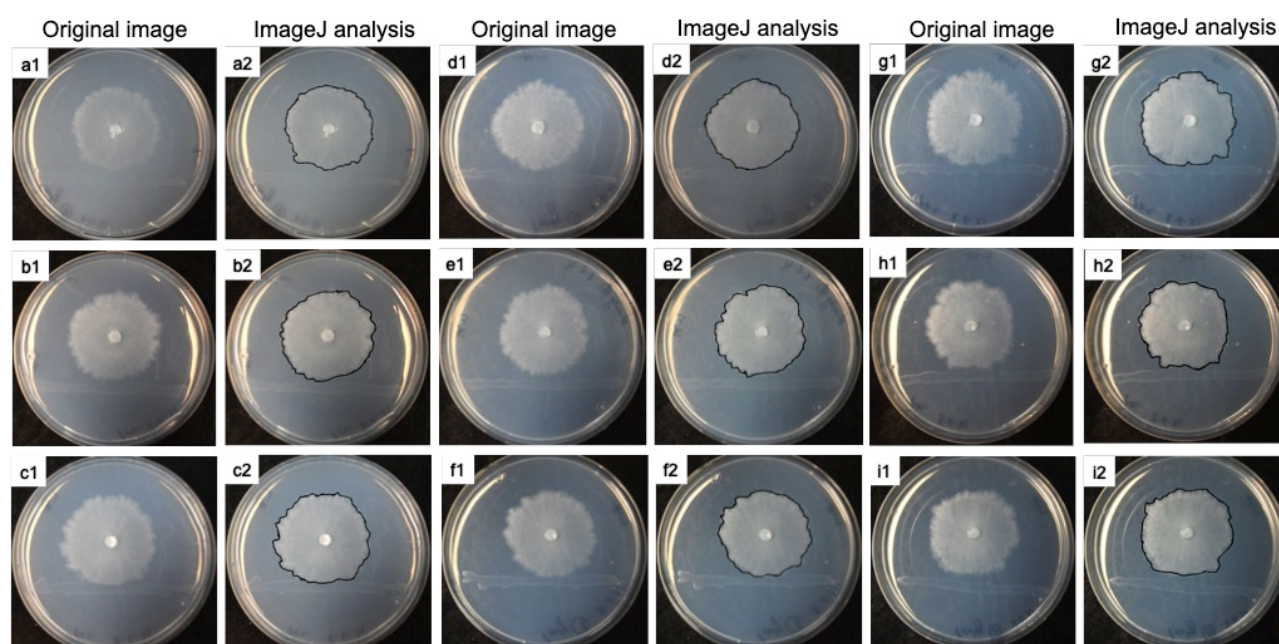

**Figure S5:** Petri dishes showing the area covered by uninoculated *S. indica* when confronted with the fungus-feeding bacterium *C. fungivorans*. (a1-i1) Original image of the *S. indica* colony growing in the Petri dishes. (a2-i2) Images analyzed by ImageJ software, used to measure the area covered by *S. indica* in the Petri dishes.

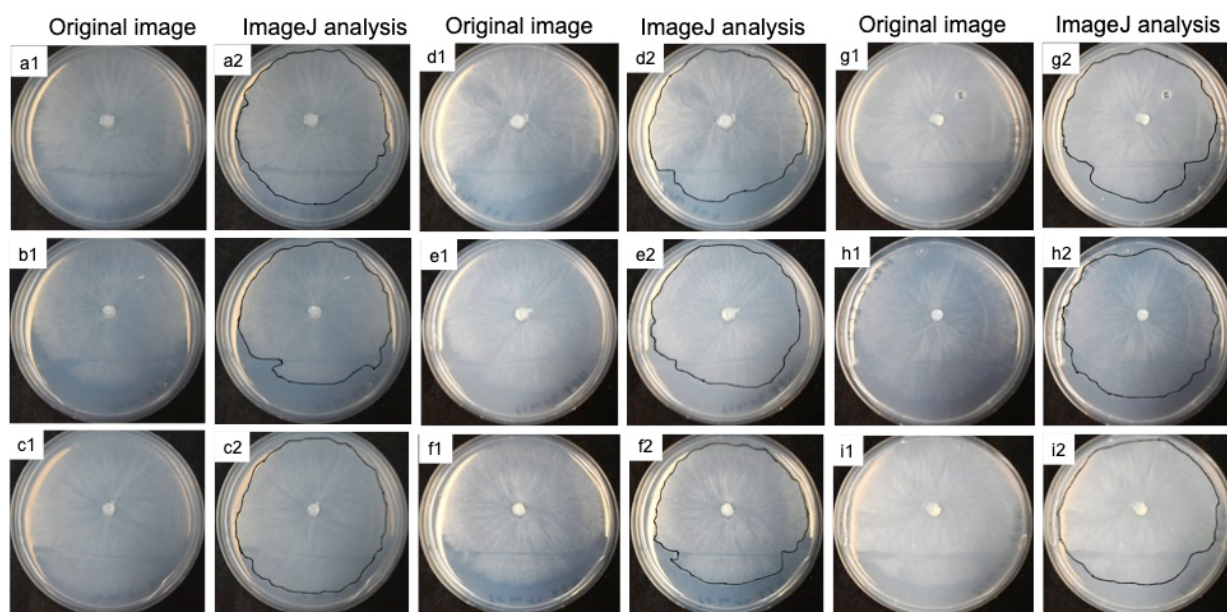

**Figure S6:** The area covered by *S. indica*-*K. radicincitans* consortia when confronted with the fungus-feeding bacterium *C. fungivorans*. (a1-i1) Original image of the *S. indica* colony growing on the Petri dishes. (a2-i2) Images analyzed by ImageJ software, used to measure the area covered by *S. indica* on the Petri dishes.

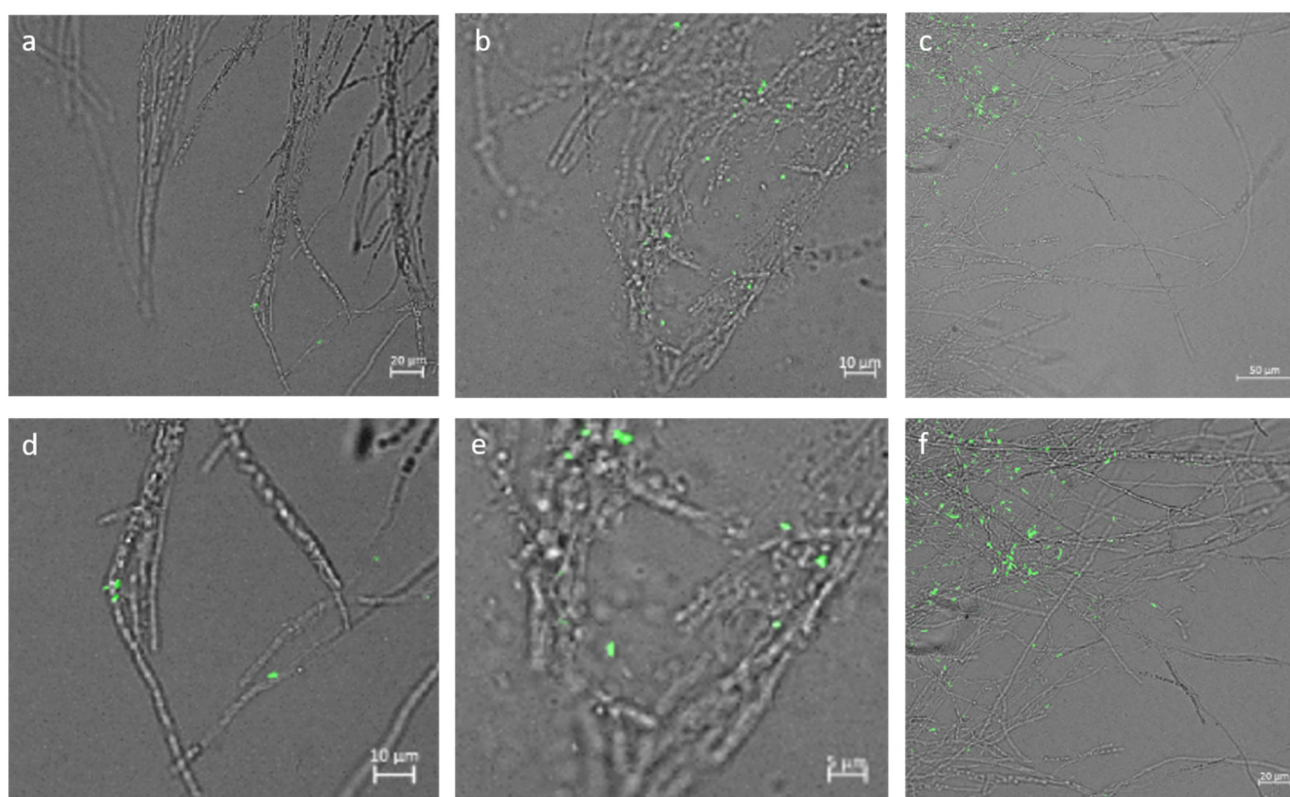

**Figure S7:** Imaging of microcolonies of *Serendipita indica* co-cultured with *Kosakonia radicincitans* for 72h at 24°C. The colonization of the fungal hyphae by *K. radicincitans* was observed microscopically. (a-c) *K. radicincitans* colonized the hyphae of *S. indica* forming bacterial aggregates 4h post inoculation. (d-e) *K.*

*radicincitans* aggregates found attached to the hyphal tips of *S. indica*. The GFP strain of *K. radicincitans* was used and *S. indica* is shown in grey scale. Pictures were taken using a confocal microscope at 40x magnification.

**Table S1.** List of primers and probe sequences used in this study

| Primer/Probes          | Sequence (5'-3')                                | Reference                   |
|------------------------|-------------------------------------------------|-----------------------------|
| Tef-f                  | ACCGTCTTGGGGTTGTATCC                            | Bütehorn et al., 2000       |
| Tef-r                  | TCGTCGCTGTCAACAAGATG                            | Bütehorn et al., 2000       |
| Eddy3for               | GTACAGAATCCCGAAGAGATTTGG                        | Ogawa-Höppener et al., 2007 |
| Eddy3rev               | ACTTAACCCAACATCTCACGACA                         | Ogawa-Höppener et al., 2007 |
| TaqMan probe<br>Sophie | FAM-CGAAAGAAAGCTGTAACACAGG-BHQ                  | Ogawa-Höppener et al., 2007 |
| 519f                   | CAGCMGCCGCGGTAANWC                              | Lane et al., 1991           |
| E.radr                 | CGTGGACTACCAGGGTATCTAATC                        | Ruppel et al., 2006         |
| E.rad TaqMan probe     | [6-FAM] CTCCCCACGCTTTCGCACCTGAGC<br>[BHQ-6-FAM] | Ruppel et al., 2006         |
